# Supplementary material for: The Alleviation of Dextran Sulfate Sodium (DSS)-Induced Colitis Correlate with the logP Values of Food-Derived Electrophilic Compounds
Source: MDPI journal article supplement (doi:10.3390/antiox11122406), 2022-12-05
Supplement: s1 [file s1]

---

## Supporting information

**Table S1** Analysis of the interaction between FECs and BTB domain of Keap1.

**Table S2** The data of correlation analysis between molecular characteristic values of FECs and DAI scores in colitis.

**Table S3** The data of correlation analysis between molecular characteristic values of FECs and pro-inflammatory cytokines in colon.

**Table S4** Correlation analysis between molecular characteristic values of FECs and oxidative indicators in colon.

**Table S5** The data of correlation analysis between molecular characteristic values of FECs and the protein expression levels of Nrf2, NQO1 and HO-1 in colon.

**Figure S1** Correlation analysis between molecular characteristic values of FECs and DAI scores in colitis.

**Figure S2** Correlation analysis between molecular characteristic values of FECs and pro-inflammatory cytokines in colon.

**Figure S3** Correlation analysis between molecular characteristic values of FECs and oxidative indicators in colon.

**Figure S4** Correlation analysis between molecular characteristic values of FECs and the protein expression levels of Nrf2, NQO1 and HO-1 in colon.

**Table S1** Analysis of the interaction between FECs and BTB domain of Keap1.

| Compound name | amino acid | Interaction force            |
|---------------|------------|------------------------------|
| FMA           | Tyr85      | Hydrogen bond                |
|               | His129     | Hydrogen bond                |
|               | His154     | Hydrogen bond                |
|               | Asn157     | Hydrogen bond                |
|               | Gln86      | Van der Waals                |
|               | Gly127     | Van der Waals                |
|               | Ile128     | Van der Waals                |
|               | Val132     | Van der Waals                |
|               | Val155     | Van der Waals                |
|               | Gly158     | Van der Waals                |
| ISO           | Lys131     | Hydrogen bond                |
|               | Arg135     | Hydrogen bond                |
|               | Cys151     | Hydrogen bond, Pi-alkyl      |
|               | Tyr85      | Van der Waals                |
|               | Val132     | Van der Waals                |
|               | Gly148     | Van der Waals                |
|               | His129     | Pi-cation                    |
| CA            | His154     | Pi-Pi stacked                |
|               | Tyr85      | Hydrogen bond                |
|               | His154     | Hydrogen bond, Pi-Pi stacked |
|               | Val132     | Van der Waals                |
|               | His129     | Pi-cation                    |
|               | Lys131     | Pi-alkyl                     |
|               | Cys151     | Pi-alkyl                     |

---

|           |        |               |
|-----------|--------|---------------|
| <b>FA</b> | Glu149 | Hydrogen bond |
|           | Lys150 | Van der Waals |
|           | Val152 | Van der Waals |
|           | His154 | Van der Waals |
|           | Leu175 | Van der Waals |
|           | Leu153 | Pi-alkyl      |

|            |        |               |
|------------|--------|---------------|
| <b>SFN</b> | His129 | Hydrogen bond |
|            | Tyr85  | Van der Waals |
|            | Gly127 | Van der Waals |
|            | Ile128 | Van der Waals |
|            | Val132 | Van der Waals |
|            | Leu153 | Van der Waals |
|            | Asn157 | Van der Waals |
|            | Gly158 | Van der Waals |
|            | His154 | Pi-sulfur     |

|            |        |               |
|------------|--------|---------------|
| <b>CGA</b> | Lys131 | Hydrogen bond |
|            | Arg135 | Hydrogen bond |
|            | Gly148 | Hydrogen bond |
|            | Tyr85  | Van der Waals |
|            | Val132 | Van der Waals |
|            | Met147 | Van der Waals |
|            | Lys150 | Van der Waals |
|            | His129 | Pi-cation     |
|            | His154 | Pi-Pi stacked |
|            | Cys151 | Pi-alkyl      |

---

**Table S2** The data of correlation analysis between molecular characteristic values of FECs and DAI scores in colitis.

|                            | <u>DAI score</u> | <u>logP</u>    | <u>Keap1 affinity</u> | <u>Electrophilic index</u> |
|----------------------------|------------------|----------------|-----------------------|----------------------------|
| <u>DAI score</u>           | <u>1</u>         | <u>-0.738*</u> | <u>-0.592</u>         | <u>0.392</u>               |
| <u>logP</u>                | <u>-0.738*</u>   | <u>1</u>       | <u>-0.12</u>          | <u>0.278</u>               |
| <u>Keap1 affinity</u>      | <u>-0.592</u>    | <u>-0.12</u>   | <u>1</u>              | <u>-0.754*</u>             |
| <u>Electrophilic index</u> | <u>0.392</u>     | <u>0.278</u>   | <u>-0.754*</u>        | <u>1</u>                   |

\* **P < 0.05**

**Table S3** The data of correlation analysis between molecular characteristic values of FECs and pro-inflammatory cytokines in colitis.

|                                | <u>logP</u>   | <u>Keap1 affinity</u> | <u>Electrophilic index</u> | <u>TNF-<math>\alpha</math></u> | <u>IL-1<math>\beta</math></u> | <u>IL-6</u>    |
|--------------------------------|---------------|-----------------------|----------------------------|--------------------------------|-------------------------------|----------------|
| <u>logP</u>                    | <u>1</u>      | <u>-0.012</u>         | <u>0.278</u>               | <u>-0.544</u>                  | <u>-0.618</u>                 | <u>-0.577</u>  |
| <u>Keap1 affinity</u>          | <u>-0.012</u> | <u>1</u>              | <u>-0.754*</u>             | <u>-0.45</u>                   | <u>-0.181</u>                 | <u>-0.803*</u> |
| <u>Electrophilic index</u>     | <u>0.278</u>  | <u>-0.754*</u>        | <u>1</u>                   | <u>0.561</u>                   | <u>0.179</u>                  | <u>0.442</u>   |
| <u>TNF-<math>\alpha</math></u> | <u>-0.544</u> | <u>-0.45</u>          | <u>0.561</u>               | <u>1</u>                       | <u>0.785*</u>                 | <u>0.646</u>   |
| <u>IL-1<math>\beta</math></u>  | <u>-0.618</u> | <u>-0.181</u>         | <u>0.179</u>               | <u>0.785*</u>                  | <u>1</u>                      | <u>0.429</u>   |
| <u>IL-6</u>                    | <u>-0.577</u> | <u>-0.803*</u>        | <u>0.442</u>               | <u>0.646</u>                   | <u>0.439</u>                  | <u>1</u>       |

\* **P < 0.05**

**Table S4** Correlation analysis between molecular characteristic values of FECs and oxidative indicators in colon.

|                                      | <u>logP</u>   | <u>Keap1</u><br><u>affinity</u> | <u>Electrophilic</u><br><u>index</u> | <u>T-AOC</u>   | <u>MPO</u>     | <u>GSH-</u><br><u>px</u> | <u>SOD</u>    | <u>MDA</u>    |
|--------------------------------------|---------------|---------------------------------|--------------------------------------|----------------|----------------|--------------------------|---------------|---------------|
| <u>logP</u>                          | <u>1</u>      | <u>-0.012</u>                   | <u>0.278</u>                         | <u>0.607</u>   | <u>-0.371</u>  | <u>0.621</u>             | <u>0.517</u>  | <u>-0.402</u> |
| <u>Keap1</u><br><u>affinity</u>      | <u>-0.012</u> | <u>1</u>                        | <u>-0.754*</u>                       | <u>0.693</u>   | <u>-0.631</u>  | <u>0.59</u>              | <u>0.509</u>  | <u>-0.221</u> |
| <u>Electrophilic</u><br><u>index</u> | <u>0.278</u>  | <u>-0.754*</u>                  | <u>1</u>                             | <u>-0.385</u>  | <u>0.747</u>   | <u>-0.31</u>             | <u>-0.476</u> | <u>0.377</u>  |
| <u>T-AOC</u>                         | <u>0.607</u>  | <u>0.693</u>                    | <u>-0.385</u>                        | <u>1</u>       | <u>-0.797*</u> | <u>0.711*</u>            | <u>0.486</u>  | <u>-0.588</u> |
| <u>MPO</u>                           | <u>-0.371</u> | <u>-0.631</u>                   | <u>0.747*</u>                        | <u>-0.797*</u> | <u>1</u>       | <u>0.565</u>             | <u>-0.611</u> | <u>0.714</u>  |
| <u>GSH-px</u>                        | <u>0.621</u>  | <u>0.59</u>                     | <u>-0.31</u>                         | <u>0.711</u>   | <u>-0.565</u>  | <u>1</u>                 | <u>0.817*</u> | <u>-0.563</u> |
| <u>SOD</u>                           | <u>0.517</u>  | <u>0.509</u>                    | <u>-0.476</u>                        | <u>0.486</u>   | <u>-0.611</u>  | <u>0.817*</u>            | <u>1</u>      | <u>-0.332</u> |
| <u>MDA</u>                           | <u>-0.402</u> | <u>-0.221</u>                   | <u>0.377</u>                         | <u>-0.588</u>  | <u>0.714</u>   | <u>-0.563</u>            | <u>-0.332</u> | <u>1</u>      |

\* P < 0.05

**Table S5** The data of correlation analysis between molecular characteristic values of FECs and the protein expression levels of Nrf2, NQO1 and HO-1 in colitis.

|                                      | <u>logP</u>   | <u>Keap1</u><br><u>affinity</u> | <u>Electrophilic</u><br><u>index</u> | <u>Nrf2</u>    | <u>NQO1</u>   | <u>HO-1</u>   |
|--------------------------------------|---------------|---------------------------------|--------------------------------------|----------------|---------------|---------------|
| <u>logP</u>                          | <u>1</u>      | <u>-0.012</u>                   | <u>0.278</u>                         | <u>0.922**</u> | <u>0.737*</u> | <u>0.759*</u> |
| <u>Keap1</u><br><u>affinity</u>      | <u>-0.012</u> | <u>1</u>                        | <u>-0.754*</u>                       | <u>0.173</u>   | <u>0.468</u>  | <u>0.266</u>  |
| <u>Electrophilic</u><br><u>index</u> | <u>0.278</u>  | <u>-0.754*</u>                  | <u>1</u>                             | <u>-0.069</u>  | <u>-0.382</u> | <u>-0.18</u>  |

|             |                |              |               |                |                |                |
|-------------|----------------|--------------|---------------|----------------|----------------|----------------|
| <u>Nrf2</u> | <u>0.922**</u> | <u>0.173</u> | <u>-0.069</u> | <u>1</u>       | <u>0.888**</u> | <u>0.842*</u>  |
| <u>NQO1</u> | <u>0.737*</u>  | <u>0.468</u> | <u>-0.382</u> | <u>0.888**</u> | <u>1</u>       | <u>0.953**</u> |
| <u>HO-1</u> | <u>0.759*</u>  | <u>0.266</u> | <u>-0.18</u>  | <u>0.842*</u>  | <u>0.953**</u> | <u>1</u>       |

\* P < 0.05, \*\* P < 0.01

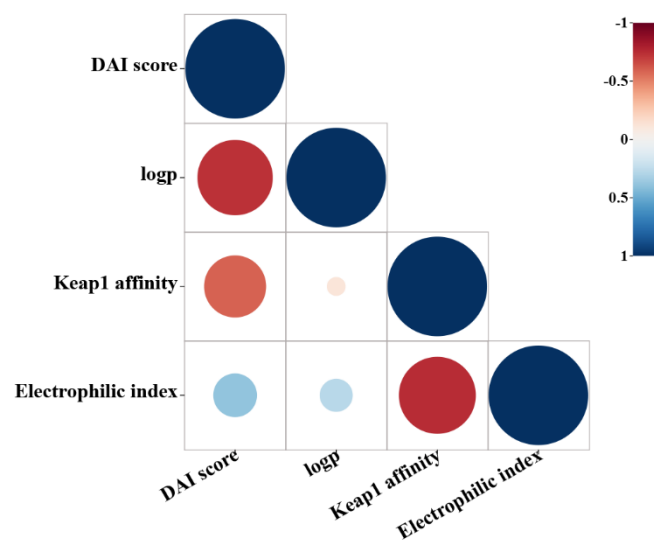

**Figure S1** Correlation analysis between molecular characteristic values of FECs and DAI scores in colitis.

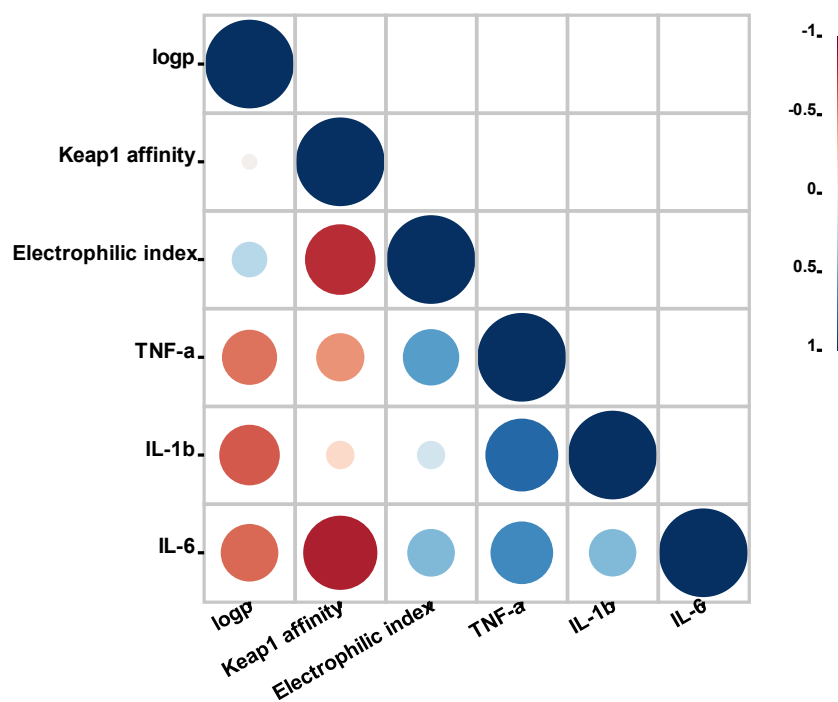

**Figure S2** Correlation analysis between molecular characteristic values of FECs and pro-inflammatory cytokines scores in colitis.

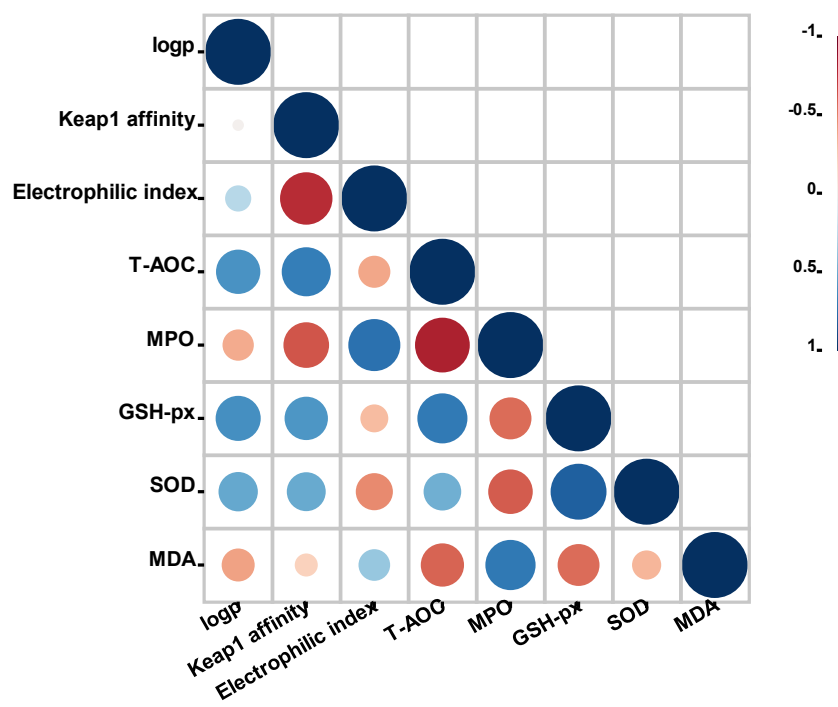

**Figure S3** Correlation analysis between molecular characteristic values of FECs and oxidative indicators in colon.



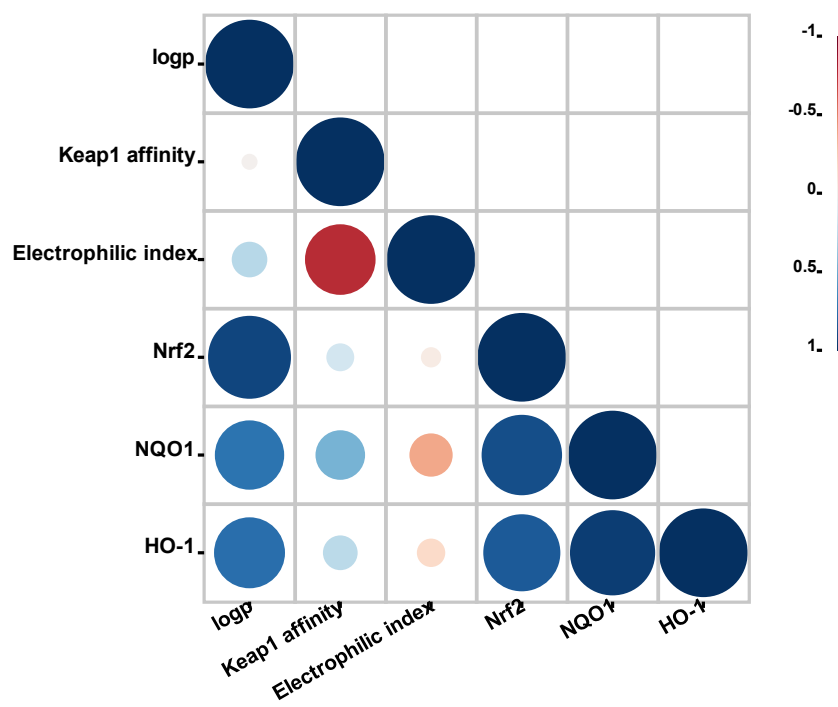

**Figure S4** Correlation analysis between molecular characteristic values of FECs and the protein expression levels of Nrf2, NQO1 and HO-1 in colon.
